# INTERNATIONALES JAHRBUCH DES DEUTSCHEN IDEALISMUS

## *INTERNATIONAL YEARBOOK OF GERMAN IDEALISM*

Rate card no. 1/2009

**Print run:** 350 copies

**Printing process:** Offset

**Artwork requirements:** PDF-Files directly:

**AZ Druck und Datentechnik GmbH**

ISDN: + 49 (831) 206-473 Leonardo

e-mail: [degruyter@az-druck.de](mailto:degruyter@az-druck.de)

Datenträger an: AZ Druck und Datentechnik GmbH

Heisinger Straße 16, D-87437 Kempten (Allgäu)

Tel.: 0831 / 206 - 185

Fax.: 0831 / 206 - 369

Please fax a copy of your ad together with the name of the file to the printing house.

Please send your advertisement order and a copy of your ad to the publisher.

**Dates of publication:** Annually in the fourth quarter

**Copy deadlines:** on request

**Format of the journal:** 230 mm height x 155 mm width

**Advertising rates:**

|           |                              |          |
|-----------|------------------------------|----------|
| Full page | 180 mm height x 117 mm width | 550 EURO |
| Half page | 85 mm height x 117 mm width  | 300 EURO |

**Inserts:** on request

**Colour Advertisings:** black and white advertisings only

**Terms of payment:** net - on receipt of invoice

**Bankers:** Postbank Berlin, Acct. no. 103 07-108 (BLZ 100 100 10)  
Berliner Bank AG, Acct. no. 32 07523 500 (BLZ 100 200 00)

The publisher reserves the right to refuse advertisements.

**Orders and enquiries to:** Dietlind Makswitat  
Advertising Coordinator.  
Walter de Gruyter GmbH & Co.  
Genthiner Straße 13  
D-10785 Berlin  
Tel (++49) 30 - 260 05-131; Fax (++49) 30 - 260 05-322  
e-mail: [mailto:anzeigen@degruyter.com](mailto:mailto:anzeigen@degruyter.com)
